# Supplementary material for: Topological structures and syntenic conservation in sea anemone genomes
Source: PubMed Central journal article supplement (PMC10719294; doi:10.1038/s41467-023-44080-7), 2023-12-13
Supplement: 41467_2023_44080_MOESM3_ESM.pdf [file 41467_2023_44080_MOESM3_ESM.pdf]

## **Description of Additional Supplementary Files**

### **Supplementary Data 1**

Description: Summary of repetitive sequence content in the *N. vectensis* and *S. callimorphus* genomes reported by RepeatMasker.

### **Supplementary Data 2**

Description: Chromosome-wise abundance and enrichment of repeat classes in *N. vectensis*.

### **Supplementary Data 3**

Description: Chromosome-wise abundance and enrichment of repeat families in *N. vectensis*.

### **Supplementary Data 4**

Description: Chromosome-wise abundance and enrichment of repeat classes in *S. callimorphus*.

### **Supplementary Data 5**

Description: Chromosome-wise abundance and enrichment of repeat families in *S. callimorphus*.

### **Supplementary Data 6**

Description: Genomic locations of a subset of the ANTP, PRD, SINE, TALE and HNF class homeobox genes in the *N. vectensis* genome.

### **Supplementary Data 7**

Description: Table of correspondence between *N. vectensis* cloned complete CDS sequences in the NCBI database and NV2 models.

### **Supplementary Data 8**

Description: Ultraconserved Noncoding Elements in the *N. vectensis* genome.

### **Supplementary Data 9**

Description: Genes contained in the cnidarian ancestral linkage groups.

### **Supplementary Data 10**

Description: Genes contained in the bilaterian ancestral linkage groups.

### **Supplementary Data 11**

Description: Genes contained in the metazoan ancestral linkage groups.

### **Supplementary Data 12**

Description: Number of microsyntenic blocks in deuterostomes, spiralian and cnidarians.

**Supplementary Data 13**

Description: Relationship between the ALGs predicted in this work and those in Simakov et al 2022. Pairs of metazoan ALGs are included that share at least 5 genes between the two studies in all used genomes, based in Data File S1 in that work [[10.1126/sciadv.abi5884](https://doi.org/10.1126/sciadv.abi5884)].

**Supplementary Data 14**

Description: Data sources for ATAC-seq.

**Supplementary Data 15**

Description: Data files required to reproduce the analyses. See github repository <https://github.com/nijibabulu/cnidariangenomes> for details.
